# Supplementary material
Source: Elsevier journal article supplement (https://www.sciencedirect.com/science/article/pii/S1138359321002252)
Supplement: mmc1 [file S1138359321002252:mmc1.doc]

**Material Suplementario**

**Tabla S1.** Perfiles de paciente con DM2 y preguntas del cuestionario online Controverti2.

| **Perfil 1. Paciente recién diagnosticado con una HbA1c >9%** | | |
| --- | --- | --- |
| 1. | En general, en su práctica clínica habitual, ¿inicia doble terapia además de recomendar dieta y ejercicio? | |
| 2. | Si no inicia doble terapia, ¿por qué tratamiento opta habitualmente? | |
| 3. | Si inicia doble terapia, ¿por qué combinación opta habitualmente?   | metformina+iDPP4 | metformina+iSGLT2 | metformina+insulina | | --- | --- | --- | | metformina+SU | metformina+arGLP1 | Otra | | |
| 4. | Seleccione por orden los 5 factores clínicos* que considera más relevantes para modificar la actitud terapéutica que ha reportado en la pregunta previa (a responder solo por los que inician doble terapia). | |
| 5. | ¿Qué tratamiento instauraría en cada caso?   | metformina+iDPP4 | metformina+iSGLT2 | metformina+insulina | | --- | --- | --- | | metformina+SU | metformina+arGLP1 |  | | |
| **Perfil 2. Paciente con DM2 no controlado con metformina** | | |
| 6. | | En general, en su práctica clínica habitual, además de insistir en los cambios de estilo  de vida y valorar el cumplimiento terapéutico, ¿qué agente añadiría al tratamiento en  primera instancia?   | SU | iSGLT2 | pioglitazona | insulina | | --- | --- | --- | --- | | iDPP4 | arGLP1 | repaglinida |  | |
| 7. | | Seleccione por orden los 5 factores clínicos* que considera más relevantes para modificar la actitud terapéutica que ha reportado en la pregunta previa. |
| 8. | | ¿Qué tratamiento añadiría a metformina en cada caso?   | SU | iSGLT2 | pioglitazona | insulina | | --- | --- | --- | --- | | iDPP4 | arGLP1 | repaglinida |  | |
| **Perfil 3. Paciente con DM2 no controlado con metformina + iDPP4** | | |
| 9. | | En general, además de insistir en los cambios de estilo de vida y valorar el cumplimiento terapéutico, ¿qué agente añadiría al tratamiento en primera instancia?   | SU | iSGLT2 | Suspender iDPP4 y añadir arGLP1 | | --- | --- | --- | | pioglitazona | repaglinida | insulina | |
| 10. | | Seleccione por orden los 5 factores clínicos* que considera más relevantes para modificar la actitud terapéutica que ha reportado en la pregunta previa. |
| 11. | | ¿Qué tratamiento añadiría a metformina+iDPP4 en cada caso?   | SU | iSGLT2 | Suspender iDPP4 y añadir arGLP1 | | --- | --- | --- | | pioglitazona | repaglinida | insulina | |
| **Perfil 4. Paciente con DM2 no controlado con metformina + SU** | | |
| 12. | | En general, ante un paciente con DM2 no controlado con metformina + SU, ¿añade  un tercer agente o sustituye la SU por otro fármaco? |
| 13. | | Si sustituye SU por otro fármaco, ¿cuál elige habitualmente?   | iDPP4 | iSGLT2 | pioglitazona | | --- | --- | --- | | arGLP1 | repaglinida | insulina | |
| 14. | | Seleccione por orden los 3 factores clínicos* que considera más relevantes para modificar la actitud terapéutica que ha reportado en la pregunta previa (a responder solo por los que sustituyen SU por otro fármaco). |
| 15. | | ¿Qué tratamiento instauraría en cada caso?   | sustituir SU por iDPP4 | sustituir SU por arGLP1 | | --- | --- | | sustituir SU por iSGLT2 | sustituir SU por pioglitazona | | sustituir SU por repaglinida | sustituir SU por insulina | |
| 16. | | Si añade un tercer agente, ¿cuál elige habitualmente?   | iDPP4 | iSGLT2 | pioglitazona | | --- | --- | --- | | arGLP1 | repaglinida | insulina | |
| 17. | | Seleccione por orden los 3 factores clínicos* que considera más relevantes para modificar la actitud terapéutica que ha reportado en la pregunta previa (a responder solo por los que añaden un tercer agente). |
| 18. | | ¿Qué tratamiento instauraría en cada caso?   | iDPP4 | iSGLT2 | pioglitazona | | --- | --- | --- | | arGLP1 | repaglinida | insulina | |
| **Perfil 5. Paciente con DM2 no controlado con metformina + SU + iDPP4** | | |
| 19. | | Seleccione por orden los 5 factores clínicos* que considera más relevantes para la  elección del tratamiento antidiabético |
| 20. | | ¿Qué tratamiento instauraría en cada caso?   | Sustituir SU por iSGLT2 | Añadir insulina basal y retirar SU | | --- | --- | | Añadir iSGLT2 | Derivar al endocrinólogo | | Añadir pioglitazona | Otros [especificar] | | Añadir arGLP1 y retirar iDPP4 |  | |
| **Perfil 6. Paciente con DM2 no controlado con metformina + insulina basal bien titulada** | | |
| 21. | | Seleccione por orden los 5 factores clínicos* que considera más relevantes para la  elección del tratamiento antidiabético |
| 22. | | ¿Qué tratamiento instauraría en cada caso?   | Derivar al endocrinólogo | Añadir insulina en pauta basal-plus/basal-bolo | | --- | --- | | Añadir iSGLT2 | Cambiar por 2 dosis de mezcla | | Añadir iDPP4 | Otros [especificar] | | Añadir arGLP1 si obeso |  | |
| HbA1c: Hemoglobina glicosilada; DM2: Diabetes mellitus tipo 2; iDPP4: Inhibidoresde la dipeptidil peptidasa-4; iSGLT2: inhibidoresdel cotransportador sodio-glucosa tipo 2; SU: Sulfonilureas; arGLP1: agonistas del receptor del péptido similar al glucagón tipo 1 | | |

| *Factores clínicos: | | |
| --- | --- | --- |
| HbA1c <8 % | TFGe <60 mL/min/1,73 m2 | Apoyo social/familiar |
| HbA1: 8-10% | TFGe <45 mL/min/1,73 m2 | EHNA |
| HbA1c >10 % | TFGe <30 mL/min/1,73 m2 | Síntomas de hiperglucemia y/o cetosis |
| Obesidad (IMC ≥30 kg/m2) | Albuminuria | Tiempo de evolución ≥10 años |
| Presencia de ECV | Fragilidad | Comorbilidades graves (EPOC, cáncer, depresión o enfermedad mental) |
| IC | Edad ≥75 años |
| HbA1c: Hemoglobina glicosilada; IMC: índice de masa corporal; ECV: Enfermedad cardioascular; IC: Insuficiencia cardiaca; TFGe: Tasa de filtrado glomerular estimado; EPOC: Enfermedad pulmonar obstructiva crónica; EHNA: Esteatosis hepática no alcohólica | | |

**Tabla S2.** Controversias identificadas en la práctica clínica de la DM2, por perfil de paciente.

| **Perfil 1. Paciente con DM2 recién diagnosticada y HbA1c >9%** |
| --- |
| **Controversia 1:** Una cuarta parte de los MAPs no inician tratamiento con doble terapia (pregunta 1). ¿Por qué no se comienza con doble terapia? |
| **Controversia 2.** De los MAPs que no inician doble terapia, la mayoría (89%) inicia monoterapia con metformina (pregunta 2). ¿Qué se espera conseguir con la monoterapia? |
| **Controversia 3:** En el caso de presencia de ECV, sólo un 5% instauraría tratamiento con metformina + arGLP1 (pregunta 5). ¿Por qué se usan tan poco los arGLP1 cuando hay ECV en atención primaria? |
| **Perfil 2. Paciente con DM2 no controlado con metformina** |
| **Controversia 4.** El agente que añadirían en este perfil sería iDPP4 (54%), iSGLT2 (39%) y SU (5%) (pregunta 6). ¿Refleja este tratamiento la práctica clínica? |
| **Controversia 5.** ¿Por qué se prefiere como segundo escalón terapéutico la combinación con iDPP4 vs. iSGLT2? |
| **Controversia 6.** ¿A que nos referimos cuando hablamos de prevención primaria cardiovascular? |
| **Controversia 7.** Ante riesgo de hipoglucemia, los participantes utilizan iDPP4 (68%) e iSGLT2 (26%) (preguntas 7/8). ¿Por qué ante riesgo de hipoglucemia se opta por un iDPP4 frente a un iSGLT2? |
| **Perfil 4. Paciente con DM2 no controlado con metformina + SU** |
| **Controversia 8.** En este caso, la mayoría (77%) sustituye SU por otro fármaco (iDPP4 52% e iSGLT2 43%) (Preguntas 12, 13 y 16). ¿Por qué se sustituye la SU en lugar de optar por una triple terapia? y además ¿por qué se sustituye por iDPP4? |
| **Controversia 9.** Los que añaden un tercer agente, modifican su actitud terapéutica en caso de HbA1c >10 % (Insulina 82%), Presencia de ECV (iSGLT2 89%), Fragilidad (iDPP4 100%) e IMC ≥30 (iSGLT2 44% y arGLP1 44%) (Pregunta 17 y 18). ¿Qué otros factores clínicos tenemos en cuenta y qué alternativas existen? |
| **Perfil 5. Paciente con DM2 no controlado con metformina + SU + iDPP4** |
| **Controversia 10.** Entre los factores clínicos más relevantes para la elección del tratamiento antidiabético consideran la HbA1c >10 %, la presencia de ECV y el riesgo de hipoglucemia (pregunta 19). ¿Por qué ha desaparecido el peso como condicionante y aparece la hipoglucemia? |
| **Perfil 6. Paciente con DM2 no controlado con metformina + insulina basal bien titulada** |
| **Controversia 11.** En la selección de los factores clínicos más relevantes para la elección del tratamiento antidiabético se incluyó HbA1c >10 %, Presencia de ECV, IMC ≥30, TFGe <30 y Riesgo de hipoglucemia (pregunta 21 y 22). ¿Por qué aparece ahora el filtrado glomerular como factor para tener en cuenta**?** |
| DM2: Diabetes mellitus tipo 2; HbA1c: Hemoglobina glicosilada; iDPP4: Inhibidores de la dipeptidil peptidasa-4; iSGLT-2: Inhibidores del cotransportador de sodio-glucosa tipo 2; SU: Sulfonilureas; arGLP-1: agonistas de los receptores del péptido similar al glucagón tipo 1; ECV: Enfermedad cardiovascular; IMC: Índice de masa corporal; TFGe: Tasa de filtrado glomerular estimado; met: metformina. |
